# Supplementary material
Source: publisher figshare collection journal article supplement (https://tandf.figshare.com/articles/dataset/_/1632849)
Supplement: Supplementary file 2 [file 1]

## SUPPLEMENTARY DATA 4

A primitive hadrosaurid from southeastern North America and the origin and early evolution of  
'duck-billed' dinosaurs

ALBERT PRIETO-MÁRQUEZ,<sup>\*1</sup> GREGORY M. ERICKSON,<sup>2</sup> and JUN A. EBERSOLE<sup>3</sup>

<sup>1</sup> School of Earth Sciences, University of Bristol, Life Sciences Building, 24 Tyndall Avenue, Bristol BS8  
1TQ, United Kingdom, a.prietomarquez@bristol.ac.uk;

<sup>2</sup> Department of Biological Science, Florida State University, King Life Sciences Building, 319 Stadium  
Drive, Tallahassee 32306, Florida, U.S.A., gerickson@bio.fsu.edu;

<sup>3</sup> McWane Science Center, 200 19<sup>th</sup> Street North, Birmingham, Alabama 35203, U.S.A.,  
jebersole@mcwane.org

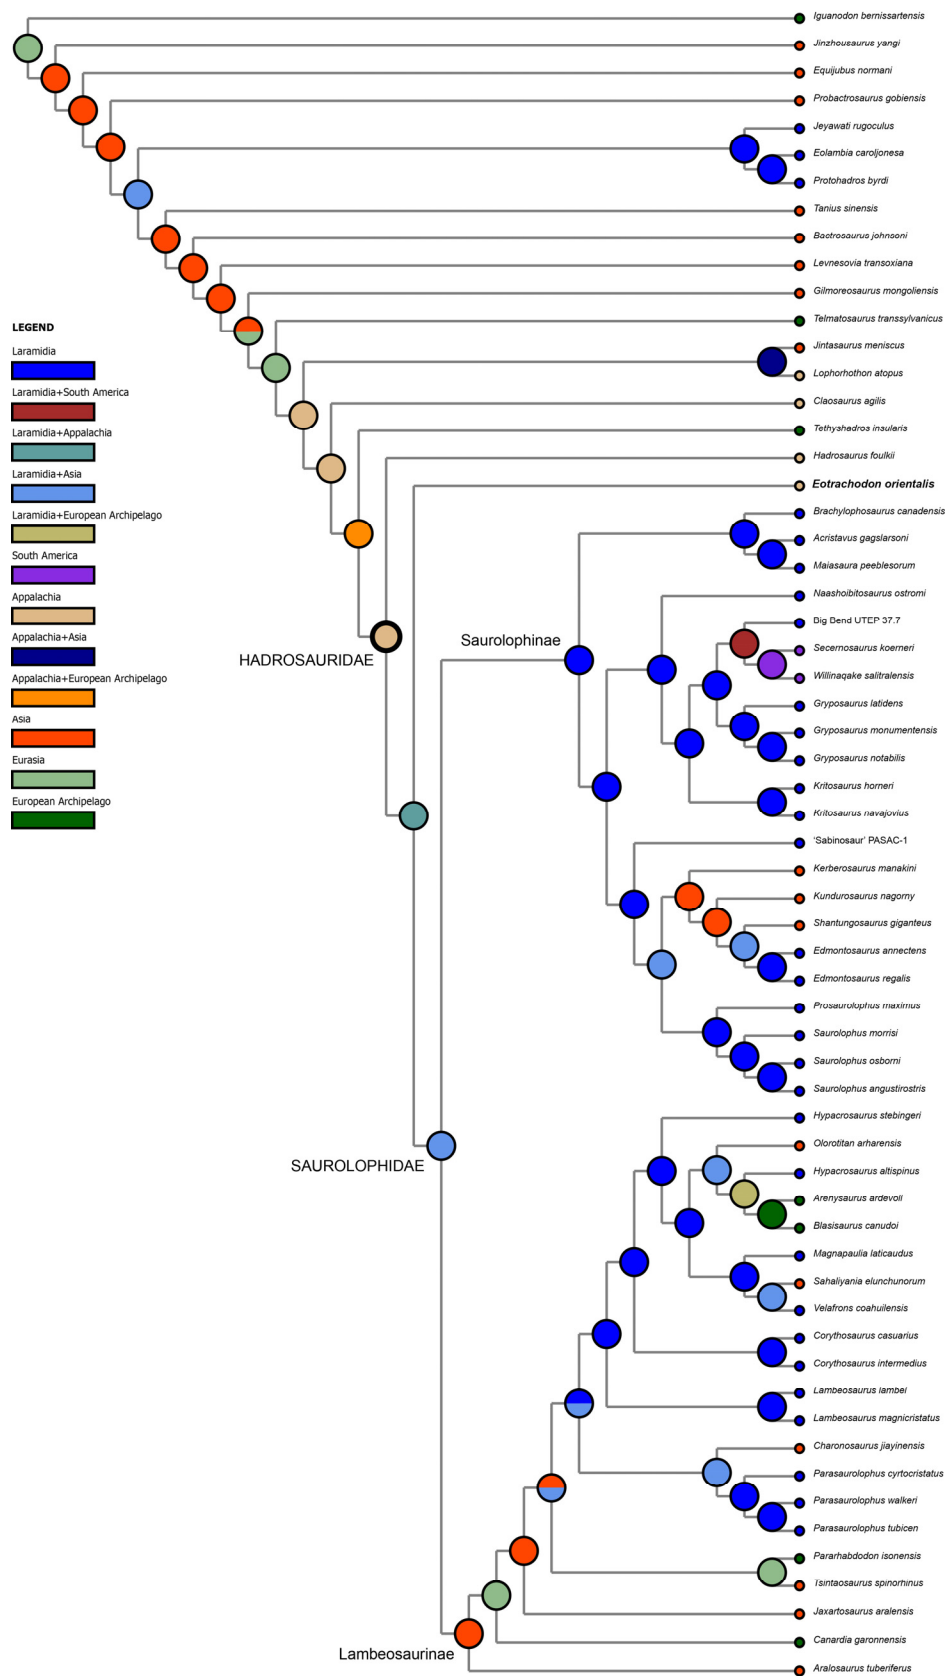

FIGURE S1. S-DIVA optimal ancestral area reconstructions on most parsimonious tree #1.

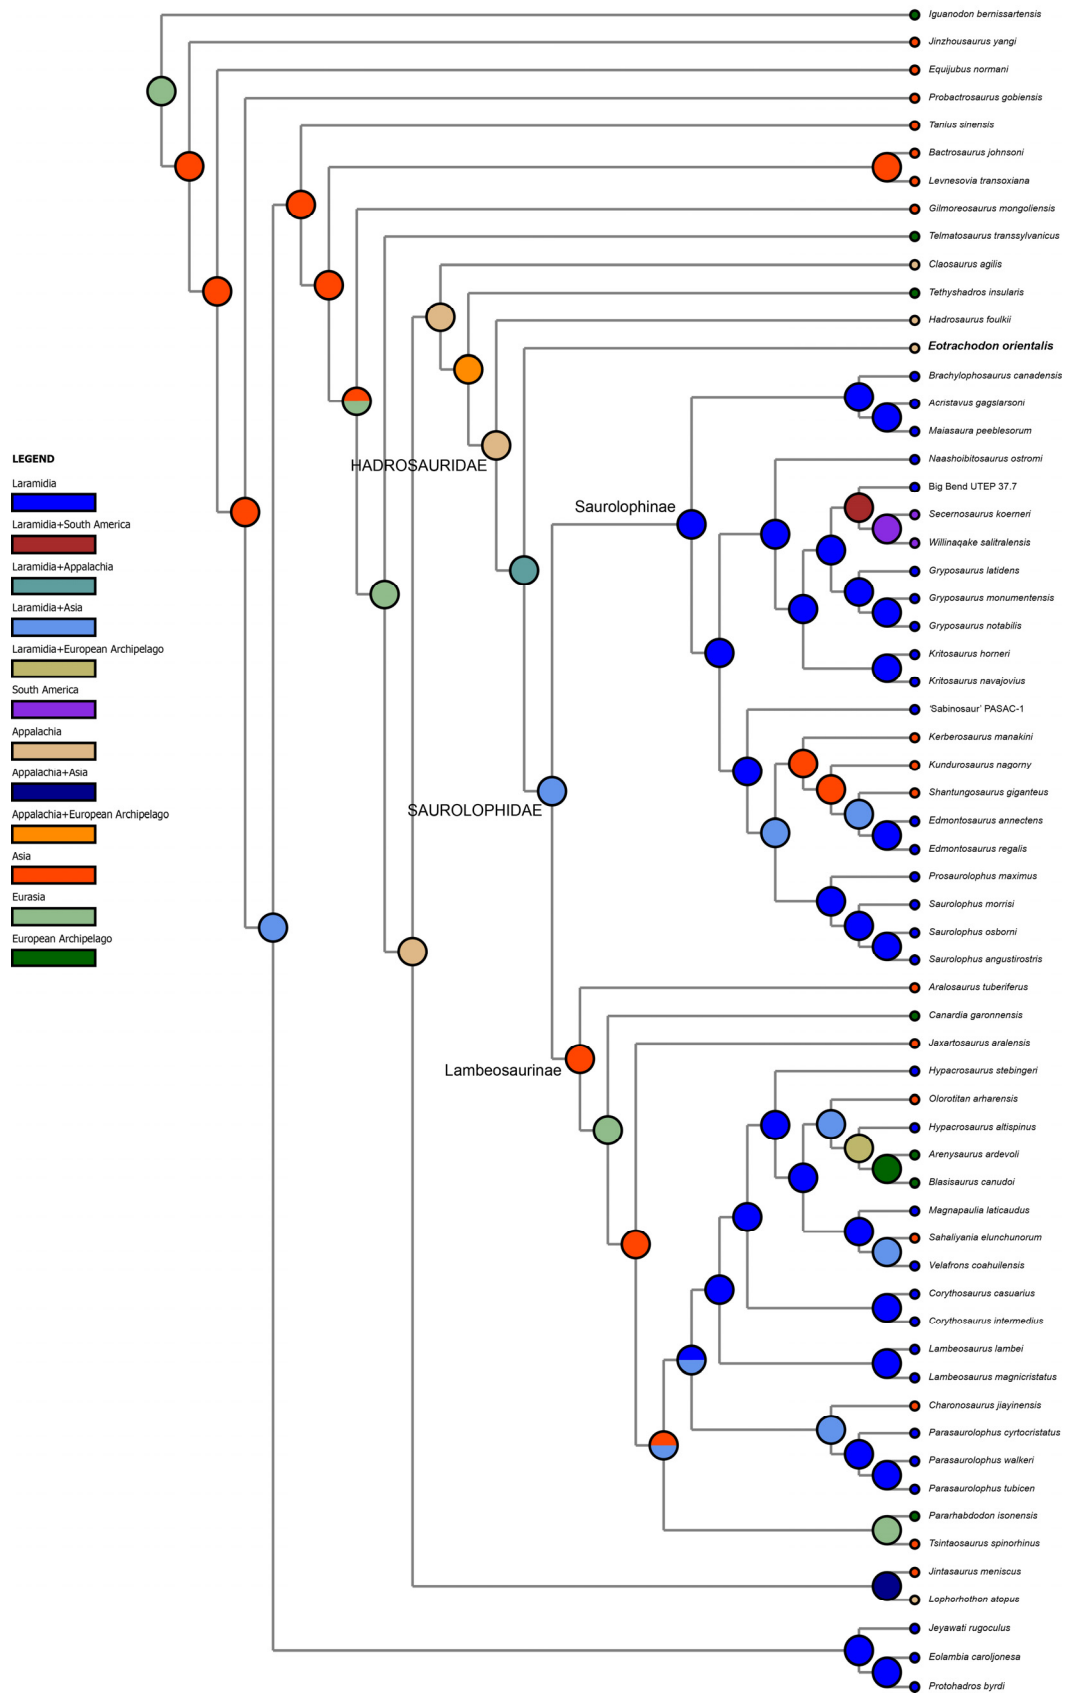

FIGURE S2. S-DIVA optimal ancestral area reconstructions on most parsimonious tree #2.

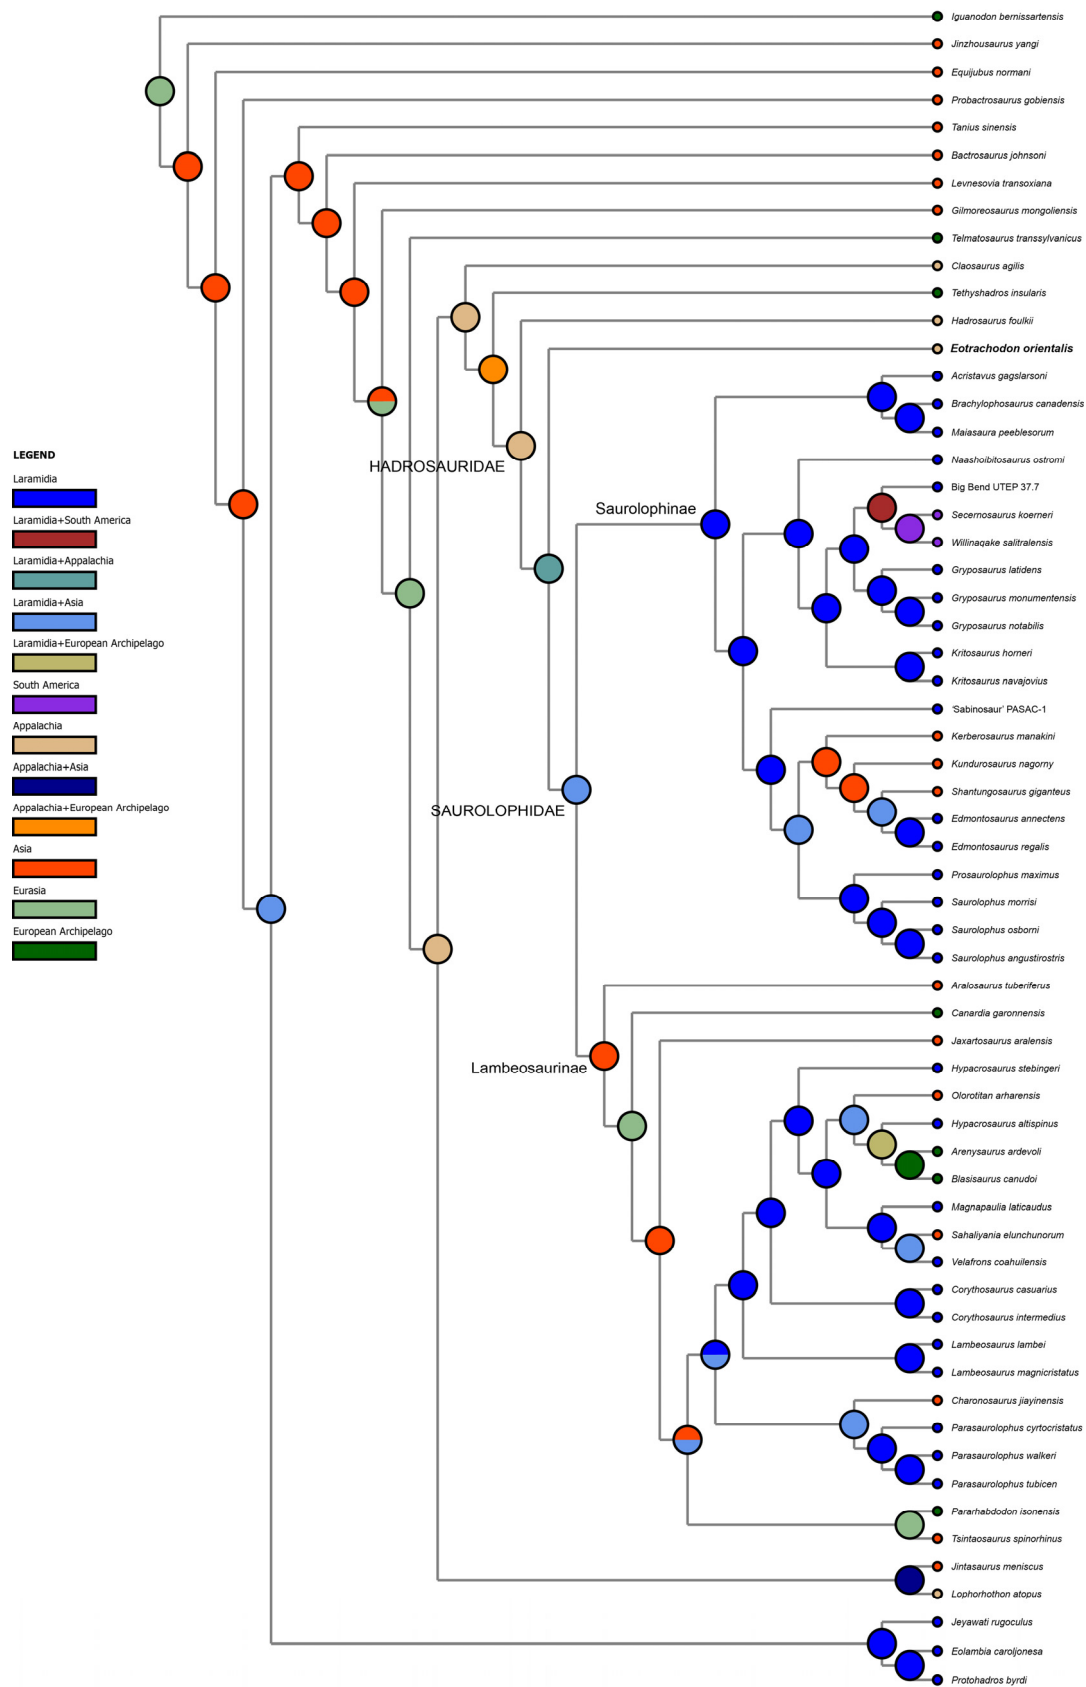

FIGURE S3. S-DIVA optimal ancestral area reconstructions on most parsimonious tree #3.

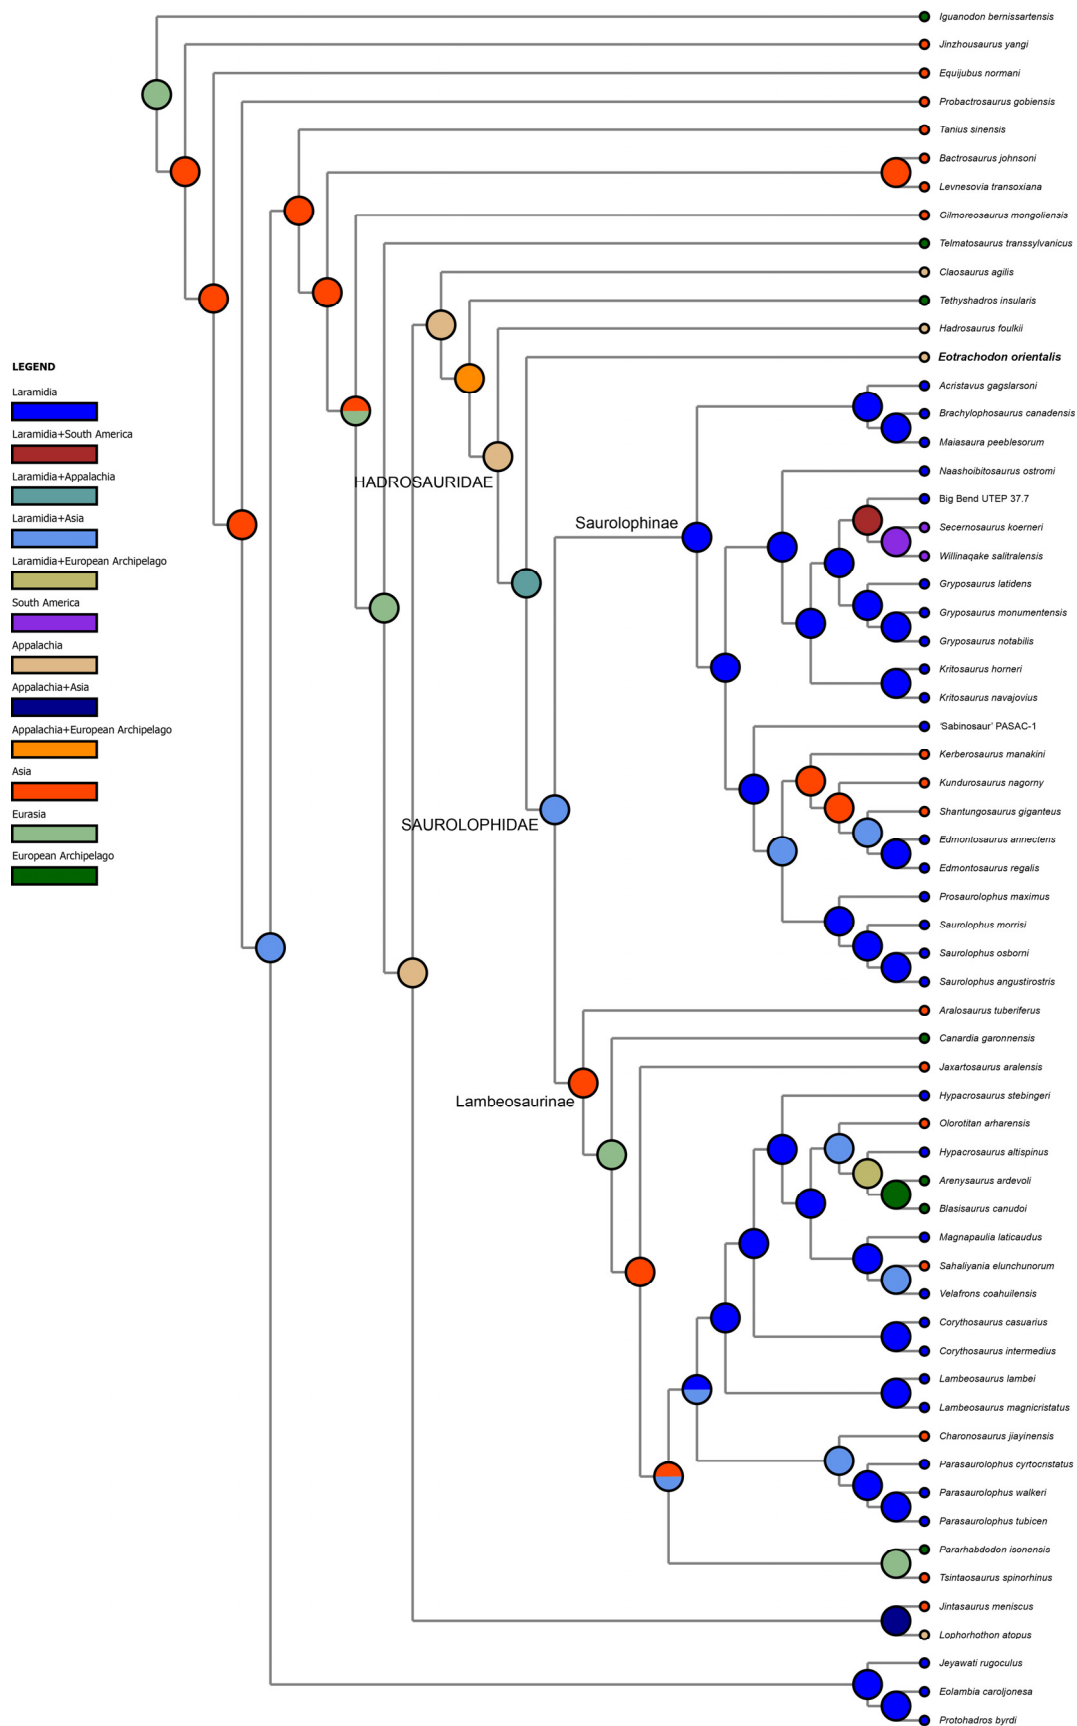

FIGURE S4. S-DIVA optimal ancestral area reconstructions on most parsimonious tree #4.
